# Supplementary material for: Combined Impact of Magnetic Force and Spaceflight Conditions on Escherichia coli Physiology
Source: MDPI journal article supplement (doi:10.3390/ijms23031837), 2022-02-06
Supplement: s1 [file s1]

| Space experiment                                                     | August |    |    |    |    |    |    |    |    |    |  |   |   |   |   |   |   |
|----------------------------------------------------------------------|--------|----|----|----|----|----|----|----|----|----|--|---|---|---|---|---|---|
|                                                                      | 22     | 23 | 24 | 25 | 26 | 27 | 28 | 29 | 30 | 31 |  | 1 | 2 | 3 | 4 | 5 | 6 |
| 1. Bacteria for proteomic research (4 cuvettes) and TEM (2 cuvettes) |        |    |    |    |    |    |    |    |    |    |  |   |   |   |   |   |   |
| 2. Bacteria for plating (4 cuvettes) and SEM (2 cuvettes)            |        |    |    |    |    |    |    |    |    |    |  |   |   |   |   |   |   |
| Ground experiment                                                    | August |    |    |    |    |    |    |    |    |    |  |   |   |   |   |   |   |
|                                                                      | 22     | 23 | 24 | 25 | 26 | 27 | 28 | 29 | 30 | 31 |  | 1 | 2 | 3 | 4 | 5 | 6 |
| 1. Bacteria for proteomic research (2 cuvettes + 2 controls)         |        |    |    |    |    |    |    |    |    |    |  |   |   |   |   |   |   |
| 2. Bacteria for plating (2 cuvettes + 4 controls)                    |        |    |    |    |    |    |    |    |    |    |  |   |   |   |   |   |   |
| 3. Bacteria for TEM (2 cuvettes + 4 controls)                        |        |    |    |    |    |    |    |    |    |    |  |   |   |   |   |   |   |

-  - Start from Earth
-  - Experiment
-  - 144 h fixation
-  - Return to Earth
-  - 24 h ground control fixation
