# Supplementary material for: Combined Impact of Magnetic Force and Spaceflight Conditions on Escherichia coli Physiology
Source: MDPI journal article supplement (doi:10.3390/ijms23031837), 2022-02-06
Supplement: s1 [file s1]

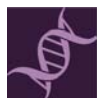

### Calculation of Magnetic Force Affecting Bacteria under Magnetic Levitation Conditions

The magnetic force  $F_m$  affecting a bacterium in the stationary conditions of magnetic levitation can be easier evaluated from the following considerations. Three forces, which are the directed upward Archimedes force  $F_A$ , the directed toward gravity  $F_g$ , and the magnetic field  $F_m$  directed toward a local minimum of the magnetic field, act as the bacterial cell underground conditions. The bacterium was under magnetic levitation at the point where the resultant of these three forces taken along the vertical axe was zero,

$$F_g = F_A + F_m \quad (1)$$

then

$$F_m = F_g - F_A = g V (\rho_b - \rho_m) \quad (2)$$

where  $g$  is a gravity acceleration,  $V$  is a bacterial volume,  $\rho_b$  is a bacterial specific density, and  $\rho_m$  is a specific density of the medium. The *E. coli* cell volume is about  $6 \mu\text{m}^3$  ( $6 \times 10^{-18} \text{ m}^3$ ).  $\rho_m$  is close to the water density and will be considered as  $1 \text{ kg} \times \text{m}^{-3}$ . As for bacterial specific density, the published values of microorganism specific density ranged between  $1.05 \rho_m$  up to  $2 \rho_m$  (). Then as it was determined from Equation 2, the range of magnetic force  $F_m$  was  $F_m = (3 \div 60) \times 10^{-17} \text{ N}$ .

To check these values, the magnetic force  $F_M$  that supported the aggregate formed by the bacteria and the extracellular matrix was calculated. The volume  $V$  of the aggregate was about  $60 \text{ mm}^3$  ( $6 \times 10^{-8} \text{ m}^3$ ). Using the same parameters of specific densities, the magnetic force  $F_M = (3 \div 60) \times 10^{-7} \text{ N}$ . The number of alive bacteria in the aggregate was  $5 \times 10^8 \text{ CFU}$ . Supposing all bacteria has undergone the same  $F_m$ , we could suggest that  $F_M$  would be in the range of  $(1.5 \div 30) 10^{-8} \text{ H}$ . The discrepancy between values could be due to high presence of dead cells and matrix within the aggregate that increases the aggregate volume if compared to the sum of the bacterial volumes, as well as due to non-homogeneity of the magnetic flux all over the volume of the aggregate and corresponding changes in the magnetic force. Thus these calculations support the view that the range of magnetic force  $F_m$  affecting a single bacterial cell at the local point, where it is under conditions of magnetic levitation, was  $F_m = (3 \div 60) 10^{-17} \text{ N}$ .
