# Supplementary figures and images for: Combined Impact of Magnetic Force and Spaceflight Conditions on Escherichia coli Physiology
Source: MDPI journal article supplement (doi:10.3390/ijms23031837), 2022-02-06

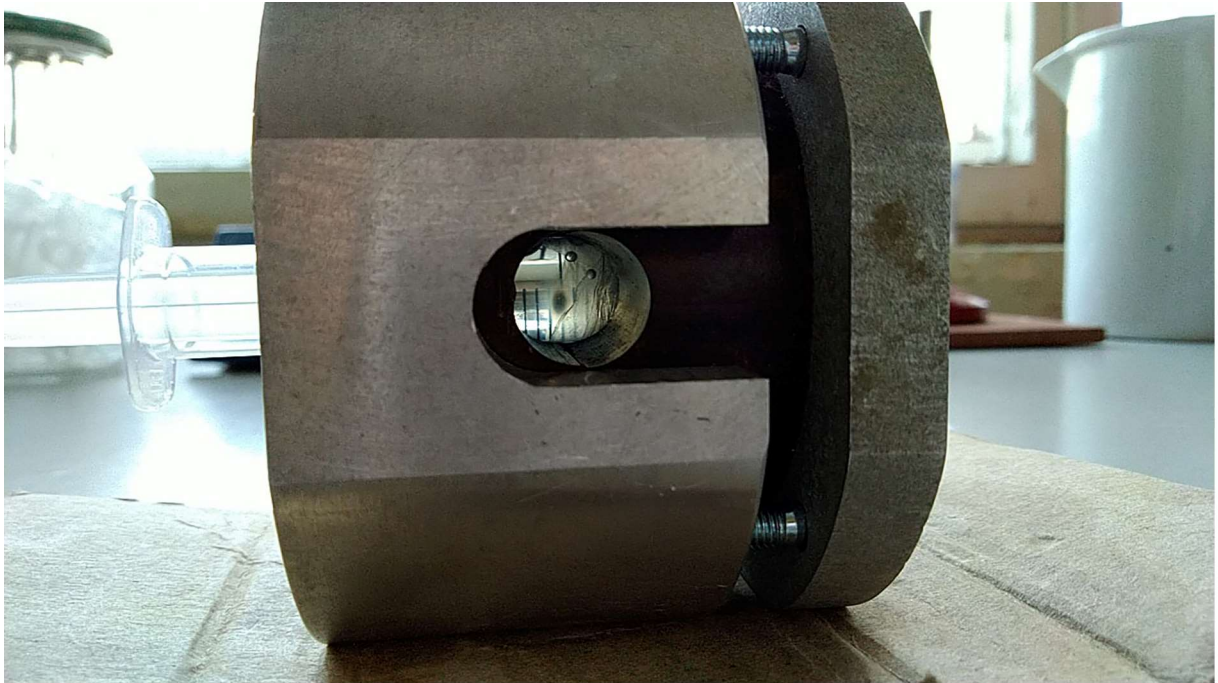

Supplement: s1 [file s1]
